# Supplementary material for: High salt diet exacerbates colitis in mice by decreasing Lactobacillus levels and butyrate production
Source: PubMed Central journal article supplement (PMC5865374; doi:10.1186/s40168-018-0433-4), 2018-03-22
Supplement: 40168_2018_433_MOESM2_ESM.pdf [file 40168_2018_433_MOESM2_ESM.pdf]

## Supplementary Methods

### Macroscopic evaluation of DSS colitis in mice

|                                              |          |     |
|----------------------------------------------|----------|-----|
| <b>Presence of pellets in proximal colon</b> | yes      | 0   |
|                                              | no       | 0.5 |
| <b>Presence of pellets in distal colon</b>   | yes      | 0   |
|                                              | no       | 0.5 |
| <b>Pellet consistency</b>                    | normal   | 0   |
|                                              | soft     | 0.5 |
|                                              | diarrhea | 1   |
| <b>Blood in anus</b>                         | yes      | 0.5 |
|                                              | no       | 0   |
| <b>Blood in cecum</b>                        | yes      | 0.5 |
|                                              | no       | 0   |
| <b>Blood in colon</b>                        | yes      | 0.5 |
|                                              | no       | 0   |
| <b>Bloody stool</b>                          | yes      | 0.5 |
|                                              | no       | 0   |
| <b>Pale and rigid distal colon</b>           | yes      | 0.5 |
|                                              | no       | 0   |

### Macroscopic evaluation of DNBS colitis in mice

| <b>Ulcer</b>        | <b># of ulcers and size (cm)</b> |
|---------------------|----------------------------------|
| <b>Diarrhea</b>     | (0-3)                            |
| <b>Adhesions</b>    | (0-3)                            |
| <b>Thickness</b>    | (0-3)                            |
| <b>Hyperemia</b>    | (0-3)                            |
| <b>Inflammation</b> | (0-3)                            |

#### Ulcer scoring:

2 points for each ulcer < than 0.5cm

3 points for each ulcer 0.5cm < x < 1cm

4 points for each ulcer => than 1cm

#### Histology scores

|                              |       |
|------------------------------|-------|
| <b>Loss of architecture</b>  | (0-3) |
| <b>Cellular infiltrate</b>   | (0-3) |
| <b>Goblet cell depletion</b> | (0-1) |
| <b>Ulcers</b>                | (0-1) |
| <b>Edema</b>                 | (0-1) |
| <b>Muscle thickening</b>     | (0-2) |
| <b>Crypt abscess</b>         | (0-1) |

## Primer's list

All primers used for Q-PCR analyses were QuantiTech Primer Assay primers (Qiagen). *Mm\_Csf2* (Ref: 249900), *Mm\_Alox15\_1* (Ref: 249900), *Mm\_Atf2\_1* (Ref: 249900), *Mm\_Rac1\_1* (Ref: 249900). As reference gene we used the TATA-box binding protein (Tbp) as previously described[1].

1. Eissa N, Hussein H, Wang H, Rabbi MF, Bernstein CN, Ghia J-E. Stability of Reference Genes for Messenger RNA Quantification by Real-Time PCR in Mouse Dextran Sodium Sulfate Experimental Colitis. *PLoS One*. 2016;11(5).

## R Code for Heatmap

```
row.names(matrix_data) <- PICRUSSt$`KEGG Pathways`  
matrix_data <- data.matrix(PICRUSSt[,2:ncol(PICRUSSt)])  
my_palette <- colorRampPalette(c("blue", "white", "red"))(n=3*50-1)  
shades <- c(seq(-3,-0.25,length=50),seq(-0.24,0.25,length=50),seq(0.26,3,length=50))  
heatmap.2(matrix_data, margins = c(10,20), breaks = shades, trace = "none", keysize=1, key.par =  
list(cex=0.5), colsep = c(5,11,16), rowsep = c(1:20), sepcolor="white", sepwidth=c(0.025,0.05), scale =  
"row", Rowv = FALSE, Colv = FALSE, dendrogram = "none", cexCol = 0.5, cexRow = 0.5, main =  
"KEGG Pathways 2", col = my_palette)
```

## Nanostring custom genes panel

| Official Symbol | Name                                                               | Accession #    |
|-----------------|--------------------------------------------------------------------|----------------|
| 5HT             | Serotonin                                                          | NM_010484.2    |
| BDNF            | Brain-derived neurotrophic factor                                  | NM_007540.4    |
| C3              | Complement component 3                                             | NM_009778.2    |
| CALB            | Calbindin 1                                                        | NM_009788.4    |
| CALRET          | Calreticulin                                                       | NM_007591.3    |
| Casp8           | Caspase 8                                                          | NM_009812.2    |
| CCR2            | C-C chemokine receptor type 2                                      | NM_009915.2    |
| CCR6            | C-C chemokine receptor type 6                                      | NM_001190333.1 |
| CD11b           | Integrin subunit alpha M                                           | NM_001082960.1 |
| CD11C           | Integrin subunit alpha X                                           | NM_021334.2    |
| Cd86            | CD86                                                               | NM_019388.3    |
| Cdh1            | E-cadherin                                                         | NM_009864.2    |
| CGRP            | Calcitonin gene-related peptide                                    | NM_007587.2    |
| CHAT            | Choline acetyltransferase                                          | NM_009891.2    |
| Cldn1           | Claudin 1                                                          | NM_016674.3    |
| Cldn2           | Claudin 2                                                          | NM_016675.3    |
| Cnlp            | Cathelin-related antimicrobial peptide (CRAMP)                     | NM_009921.2    |
| Cxcr3           | C-X-C motif chemokine receptor 3                                   | NM_009910.2    |
| Cxcr4           | C-X-C motif chemokine receptor 4                                   | NM_009911.3    |
| Defcr1          | Defensin-related cryptdin peptide-1                                | NM_010031.2    |
| F2r11           | Protease activated receptor 2 (PAR2)                               | NM_007974.4    |
| GABA A          | Gamma-aminobutyric acid A                                          | NM_010252.4    |
| GABAB           | Gamma-aminobutyric acid B                                          | NM_019439.3    |
| GATA-3          | GATA Binding Protein 3                                             | NM_008091.3    |
| GDNF            | Glial Cell Derived Neurotrophic Factor                             | NM_010275.2    |
| GFAP            | Glial Fibrillary Acidic Protein                                    | NM_001131020.1 |
| Gpr44           | Prostaglandin D2 Receptor 2                                        | NM_009962.2    |
| Hif1a           | Hypoxia Inducible Factor 1 Alpha Subunit                           | NM_010431.2    |
| HMGB1           | High Mobility Group Box 1                                          | NM_010439.3    |
| I-FABP          | Fatty acid-binding protein 2                                       | NM_007980.2    |
| Il17a           | Interleukin-17A                                                    | NM_010552.3    |
| Il22ra2         | Interleukin 22 Receptor Subunit Alpha 2                            | NM_178258.5    |
| Il23r           | Interleukin 23 receptor                                            | NM_144548.1    |
| Lyz1            | Lysozyme 1                                                         | NM_013590.3    |
| Mapk1           | Mitogen-Activated Protein Kinase 1                                 | NM_011949.3    |
| MMP9            | Matrix Metalloproteinase 9                                         | NM_013599.2    |
| Muc2            | Mucin 2                                                            | NM_023566.2    |
| Myd88           | Myeloid Differentiation Primary Response 88                        | NM_010851.2    |
| Mylk3           | myosin light chain kinase 3                                        | NM_175441.5    |
| NFAT            | Nuclear factor of activated T-cells                                | NM_010901.2    |
| Nfkb1           | Nuclear factor NF-kappa-B p105 subunit                             | NM_008689.2    |
| Nod2            | Nucleotide-binding oligomerization domain-containing protein 2     | NM_145857.2    |
| NOS             | Nitric Oxide Synthase 1                                            | NM_008712.2    |
| NPY             | Neuro peptide Y                                                    | NM_023456.2    |
| NR2B            | Glutamate Ionotropic Receptor NMDA Type Subunit 2B                 | NM_008171.3    |
| NR2D            | Glutamate Ionotropic Receptor NMDA Type Subunit 2D                 | NM_008172.2    |
| Ocln            | Occludin                                                           | NM_008756.2    |
| P75             | Nerve Growth Factor Receptor                                       | NM_033217.3    |
| PGP9.5          | Ubiquitin C-Terminal Hydrolase L1                                  | NM_011670.2    |
| Pparg           | PPAR-gamma, peroxisome proliferator activated receptor gamma       | NM_011146.1    |
| Rae1            | Ribonucleic Acid Export 1                                          | NM_175112.5    |
| Reg3g           | Regenerating Family Member 3 Gamma                                 | NM_011260.1    |
| S100BETA        | S100 Calcium Binding Protein B                                     | NM_009115.3    |
| SEMAPHORIN      | Semaphorin                                                         | NM_011352.2    |
| SOX10           | SRY-Box 10                                                         | NM_011437.1    |
| SUBP            | Substance P                                                        | XM_006505028.1 |
| T-bet           | T-box 21                                                           | NM_019507.1    |
| TAAR1           | Trace amine associated receptor 1                                  | NM_053205.1    |
| TAAR4           | Trace amine associated receptor 4                                  | NM_001008499.1 |
| Tff3            | Trefoil factor 3                                                   | NM_011575.2    |
| TGR5            | G-protein coupled bile acid receptor 1                             | NM_174985.1    |
| Tjp1            | Tight junction Protein 1 (ZO-1)                                    | NM_009386.1    |
| Tlr2            | Toll-like receptor 2                                               | NM_011905.2    |
| Tlr4            | Toll-like receptor 4                                               | NM_021297.2    |
| Tlr5            | Toll-like receptor 5                                               | NM_016928.2    |
| Tollip          | Toll Interacting Protein                                           | NM_023764.3    |
| trpv1           | transient receptor potential cation channel, subfamily V, member 1 | NM_001001445.1 |
| VIP             | Vasoactive Intestinal Peptide                                      | NM_011702.2    |
