# Supplementary material for: High salt diet exacerbates colitis in mice by decreasing Lactobacillus levels and butyrate production
Source: PubMed Central journal article supplement (PMC5865374; doi:10.1186/s40168-018-0433-4), 2018-03-22
Supplement: 40168_2018_433_MOESM4_ESM.pdf [file 40168_2018_433_MOESM4_ESM.pdf]

Figure S1

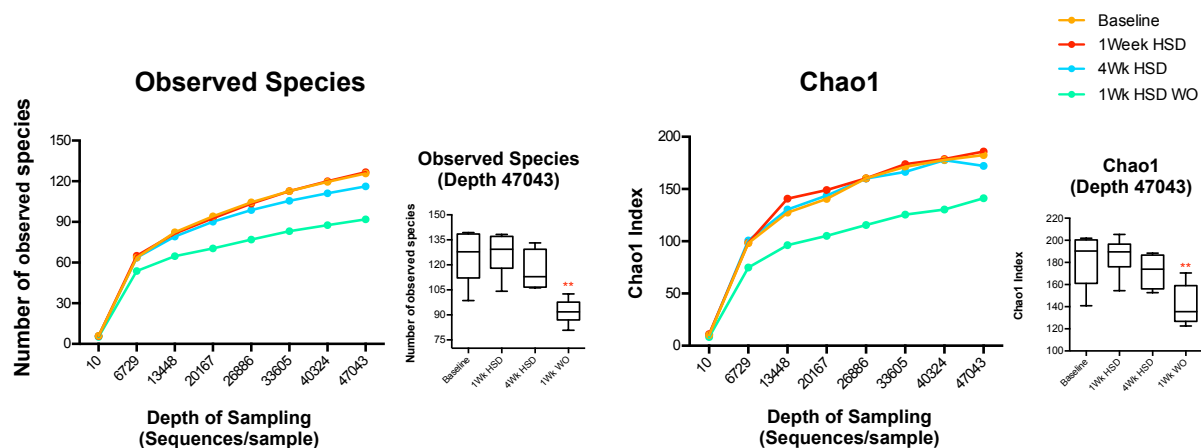

Supplementary Figure 1. HSD affects richness and diversity of fecal microbiota. Observed species and Chao1 diversity index of fecal microbiota at the indicated time points after introduction of HSD.

Figure S2

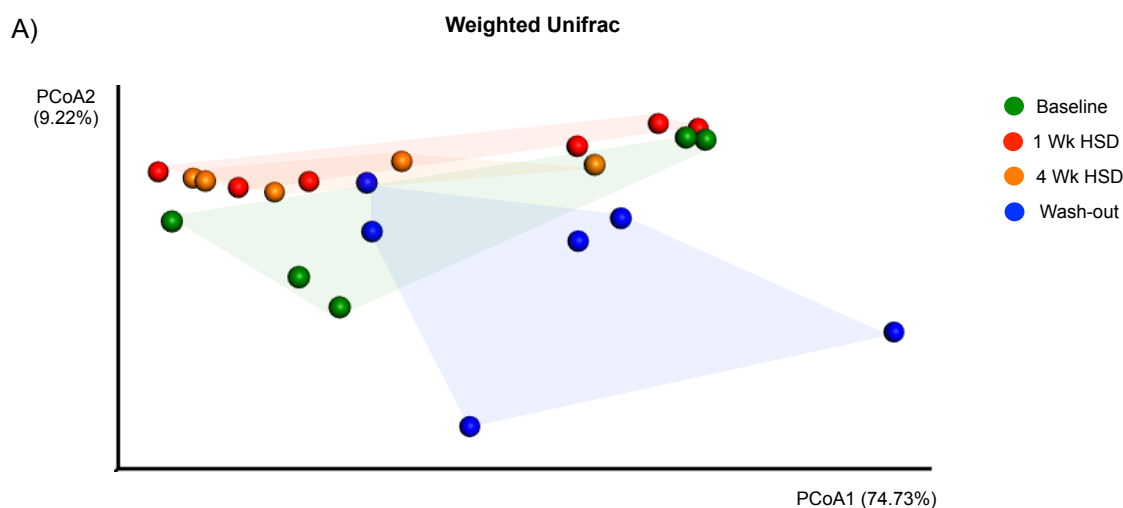

Supplementary Figure 2. Weighted Unifrac distance metrics of gut microbiota of mice fed with HSD. PCoA plot of weighted unifrac metric of fecal microbiota composition over time exposed to HSD.

**Figure S3**

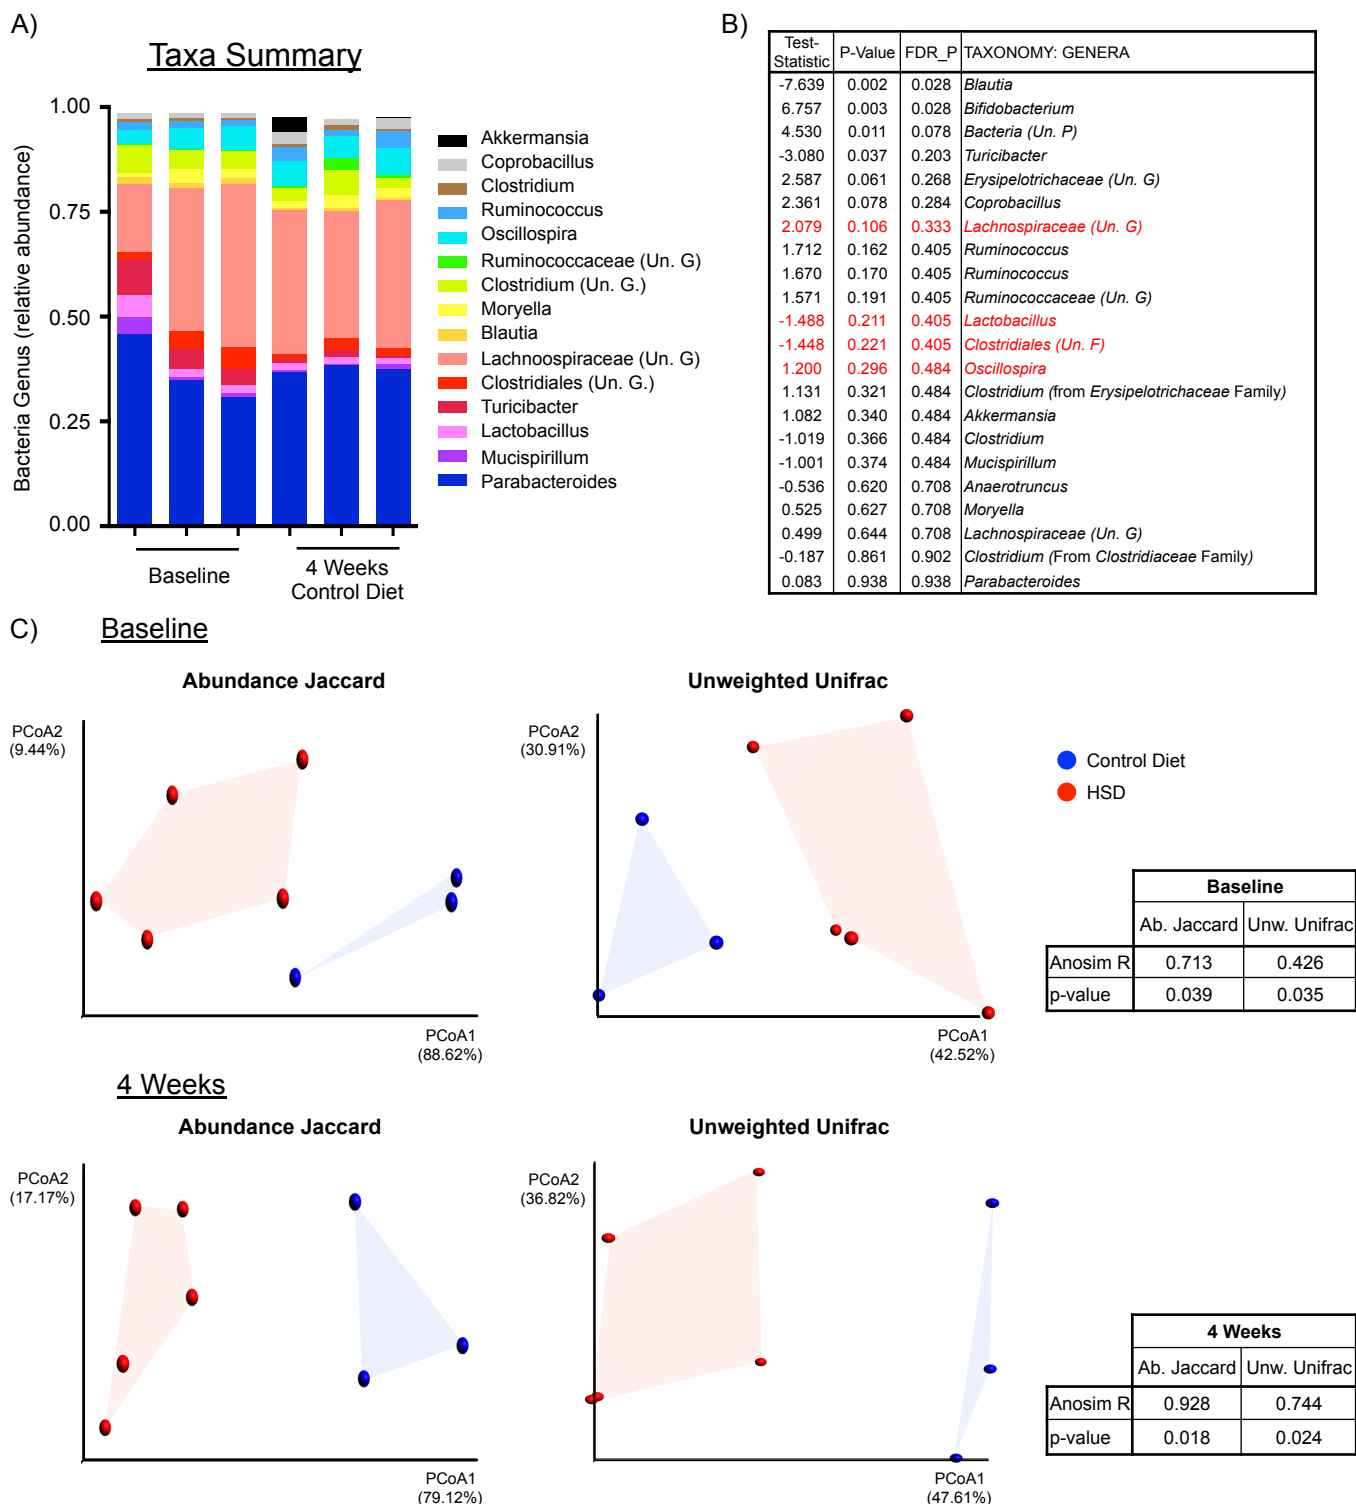

**Supplementary Figure 3. Gut microbiota is stable in mice on control diet during week 8-12** A: Summary of the relative abundance of microbial genera present in 99.9% of the community before and after 4 weeks on control diet. (Un. G: Unclassified Genus) B: Summary of the t-test statistical analysis of microbiota genera before and after 4 weeks on control diet. Highlighted in red are the taxa that were shown to correlate with HSD. C: PCoA plots of abundance Jaccard index (left panels) and unweighted unifrac metric (right panels) of fecal microbiota composition from mice on control and high salt diet, at the beginning of the experiment (Baseline) and 4 Weeks of diet. Anosim statistical analysis of respective distance metrics.

Figure S4

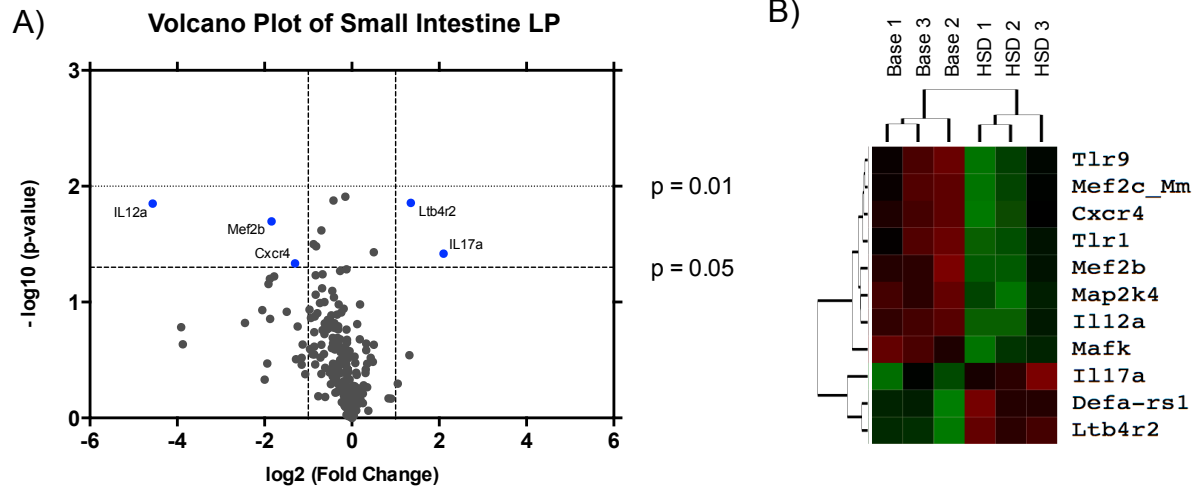

**Supplementary Figure 4. HSD modulates immune expression in small intestine *lamina propria*.** A: Volcano plot of gene expression in small intestine *lamina propria* total cell extract of mice receiving HSD or control diet for 4 weeks, n=9 mice/group. Blue dots: genes with  $p < 0.05$ , fold change  $> 2$ . B: Heatmap of immune genes that changed with HSD ( $p < 0.05$ ). The heatmap was generated based on group average, using Euclidean distance metric.

**Figure S5**

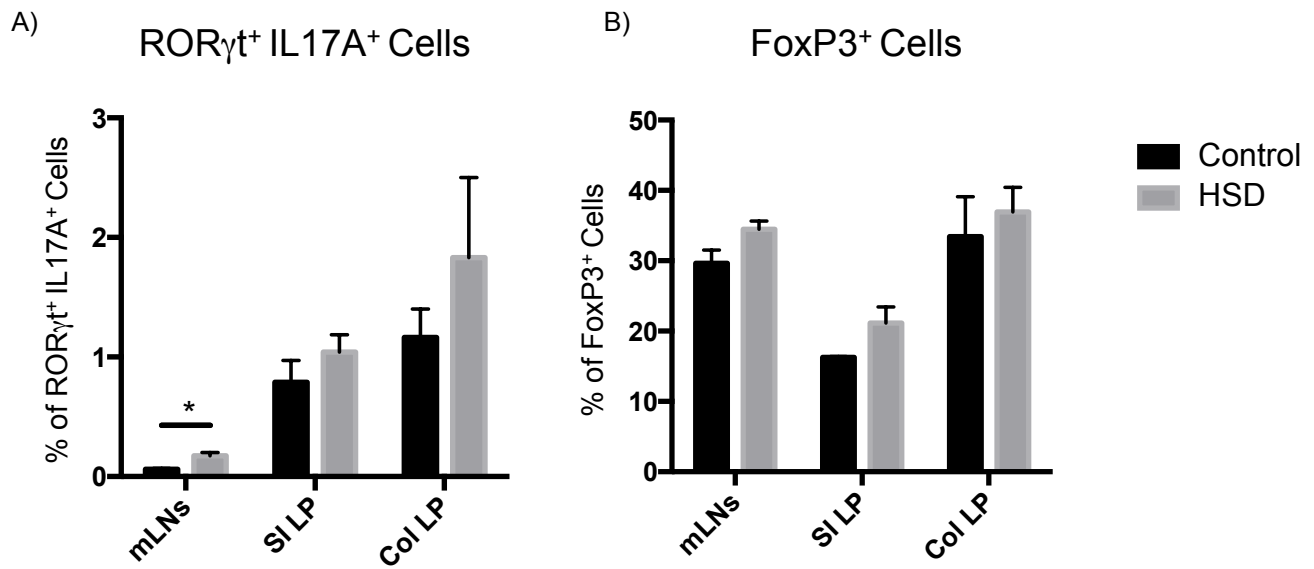

**Supplementary Figure 5. HSD increases ROR $\gamma$ t<sup>+</sup> IL17<sup>+</sup> Cells in mLN but it doesn't affect FoxP3 cells.**

Total cell extract of mesenteric lymph nodes (mLNs), small intestine *lamina propria* (SI LP) and colonic *lamina propria* (Col LP) was performed on mice fed HSD for 4 weeks (and control diet). Cells were analyzed with flow cytometry. Indicated % are from viable cells gated on TCR $\beta$ <sup>+</sup> CD4<sup>+</sup>. This is a representative experiment of 3 other different independent experiments. Values are presented as means  $\pm$  SEM; n = 6-9 mice/group. \* (p<0.05)

Figure S6

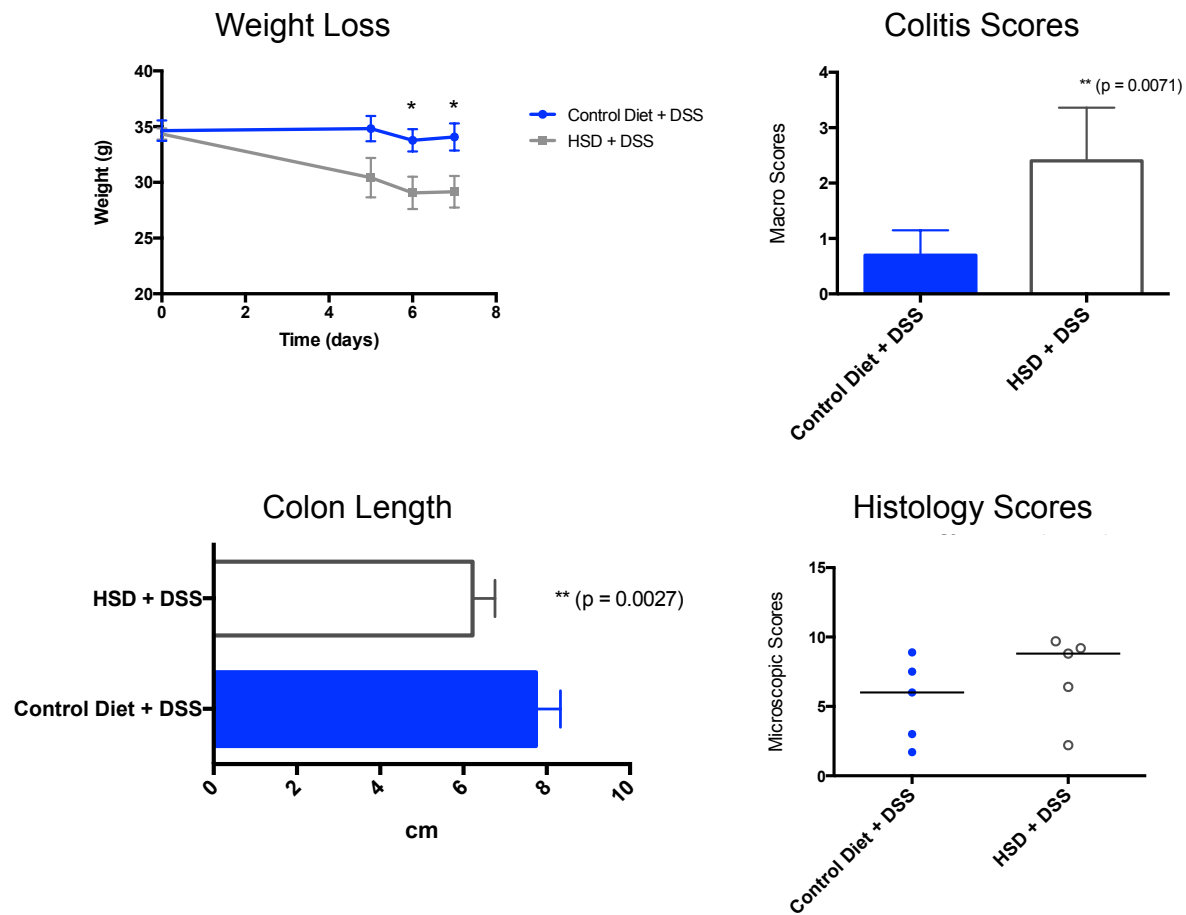

**Supplementary Figure 6. HSD increases susceptibility to DSS colitis in NIH Swiss mice.** Mice, previously fed HSD or control diet, were exposed to 3.5% DSS in drinking water during 5 days. DSS (Control diet, DSS in water), HSD+DSS (High salt diet, DSS in water). A: Body weight changes during DSS treatment B: Clinical assessment of DSS colitis at endpoint (Day 7). C: Colon length at endpoint. D: Histology score of colonic sections. Values are presented as means  $\pm$  SEM; n = 5 mice/group. \* (p<0.05) \*\* (p<0.01).

## Table S1

Table S1 - Fecal microbiota genera that significantly correlates with HSD

| Taxonomy (Genus)                   | Spearman r | p-value  | q (FDR) |
|------------------------------------|------------|----------|---------|
| <i>Lactobacillus</i>               | -0.703     | 1.39E-04 | 0.003   |
| <i>Lachnospiraceae (Un. Genus)</i> | 0.614      | 0.002    | 0.017   |
| <i>Clostridiales (Un. Genus)</i>   | -0.605     | 0.002    | 0.017   |
| <i>Oscillospira</i>                | 0.548      | 0.007    | 0.042   |

## Table S2

Table S2 - Fecal microbiota OTU that significantly correlates with HSD

| Taxonomy (OTUs)                  | Spearman r | p-value  | q (FDR) |
|----------------------------------|------------|----------|---------|
| OTU3: <i>g__Lactobacillus</i>    | -0.707     | 1.22E-04 | 0.005   |
| OTU9: <i>o__Clostridiales</i>    | -0.684     | 2.62E-04 | 0.005   |
| OTU25: <i>f__Lachnospiraceae</i> | 0.609      | 0.002    | 0.027   |
| OTU10: <i>g__Oscillospira</i>    | 0.482      | 0.022    | 0.214   |
| OTU24: <i>f__Lachnospiraceae</i> | 0.454      | 0.033    | 0.214   |
| OTU16: <i>f__Lachnospiraceae</i> | -0.454     | 0.033    | 0.214   |
| OTU2: <i>f__Lachnospiraceae</i>  | 0.427      | 0.047    | 0.260   |

## Table S3

Table S3 - List of the genes that are significantly altered by HSD in colonic lamina propria

| Gene Code                                   | Gene Name                                                  | Accession #    | log2(ratio) | P value | Type                         |
|---------------------------------------------|------------------------------------------------------------|----------------|-------------|---------|------------------------------|
| <u>Cytokines, Chemokine and Receptors</u>   |                                                            |                |             |         |                              |
| Ccl3                                        | <i>C-C motif Chemokine Ligand 3</i>                        | NM_007482.3    | -1.42       | 0.0091  | Chemokine                    |
| Ccl4                                        | <i>C-C motif Chemokine Ligand 4</i>                        | NM_144938.2    | -1.45       | 0.0182  | Chemokine                    |
| Cxcl10                                      | <i>C-X-C motif Chemokine Ligand 10</i>                     | NM_009777.2    | -0.9        | 0.017   | Chemokine                    |
| Cxcl2                                       | <i>C-X-C motif Chemokine Ligand 2</i>                      | NM_016960.1    | -2.07       | 0.039   | Chemokine                    |
| Ccr7                                        | <i>C-C motif Chemokine Receptor 7</i>                      | NM_013653.1    | -1.9        | 0.047   | Chemokine Receptor           |
| Cxcr4                                       | <i>C-X-C motif Chemokine Receptor 4</i>                    | XM_356827.6    | -1.5        | 0.0259  | Chemokine Receptor           |
| Csf2                                        | <i>Colony Stimulating Factor</i>                           | NM_007465.2    | -1.73       | 0.0157  | Cytokine                     |
| Ifi2712a                                    | <i>Interferon Alpha Inducible Protein 27 Like 2</i>        | NM_009744.3    | -1.13       | 0.0101  | Cytokine                     |
| Il1b                                        | <i>Interleukin 1 Beta</i>                                  | NM_013654.2    | -1.39       | 0.0476  | Cytokine                     |
| Il7                                         | <i>Interleukin 7</i>                                       | NM_009662.2    | 0.47        | 0.0033  | Cytokine                     |
| Tnfsf14                                     | <i>Tumor Necrosis Factor Superfamily Member 14</i>         | NM_023143.3    | -1.39       | 0.0181  | Cytokine                     |
| Il1rap                                      | <i>Interleukin-1 Receptor Accessory Protein</i>            | NM_007440.4    | 0.19        | 0.0005  | Cytokine receptor            |
| Cysltr2                                     | <i>Cysteinyl Leukotriene Receptor 2</i>                    | NM_133882.2    | -1.11       | 0.0287  | Leukotrienes Receptor        |
| Ltb4r1                                      | <i>Leukotriene B4 Receptor 1</i>                           | NM_019577.4    | -0.78       | 0.043   | Leukotrienes Receptor        |
| <u>Transcription Factors and Regulators</u> |                                                            |                |             |         |                              |
| Atf2                                        | <i>Activating Transcription Factor 2</i>                   | NM_146148.1    | 0.27        | 0.0265  | Transcription Factor         |
| Cebpb                                       | <i>CCAAT/Enhancer Binding Protein Beta</i>                 | NM_007572.2    | -0.87       | 0.0165  | Transcription Factor         |
| Irf5                                        | <i>Interferon Regulatory Factor 5</i>                      | NM_011888.2    | -0.71       | 0.0343  | Transcription Factor         |
| Mef2c_Mm                                    | <i>Myocyte-specific Enhancer Factor 2C</i>                 | NM_009778.2    | -0.67       | 0.021   | Transcription Factor         |
| Myc                                         | <i>V-Myc Avian Myelocytomatosis Viral Oncogene Homolog</i> | NM_011332.2    | -0.39       | 0.0316  | Transcription Factor         |
| Keap1                                       | <i>Kelch-like ECH-associated Protein 1</i>                 | NM_013652.1    | 0.35        | 0.045   | Regulatory Element           |
| <u>Signal Transduction Elements</u>         |                                                            |                |             |         |                              |
| Ptgs2                                       | <i>Prostaglandin-endoperoxide Synthase 2 (aka COX-2)</i>   | NM_011330.3    | -1.67       | 0.0307  | Signal Transduction Enzyme   |
| Map2k1                                      | <i>Mitogen-Activated Protein Kinase Kinase 1</i>           | NM_009704.3    | 0.59        | 0.0061  | Signal Transduction Kinsases |
| Map2k6                                      | <i>Mitogen-Activated Protein Kinase Kinase 6</i>           | NM_016704.2    | 0.41        | 0.0219  | Signal Transduction Kinsases |
| Mapk3                                       | <i>Mitogen-Activated Protein Kinase 3</i>                  | NM_009743.4    | 0.52        | 0.01    | Signal Transduction Kinsases |
| Ptger3                                      | <i>Prostaglandin E Receptor 3</i>                          | NM_009779.2    | 1.35        | 0.021   | Signal Transduction Receptor |
| Gnb1                                        | <i>G-Protein Subunit Beta 1</i>                            | NM_009660.3    | 0.25        | 0.0015  | Signaling Transduction       |
| H2-Eb1                                      | <i>Histocompatibility 2, class II antigen E Beta</i>       | NM_011124.4    | -0.77       | 0.0394  | Signaling Transduction       |
| Hras1                                       | <i>GTPase Hras (aka Transforming Protein p21)</i>          | NM_013484.2    | -2.41       | 0.0192  | Signaling Transduction       |
| Rac1                                        | <i>Ras-related C3 botulinum toxin substrate 1</i>          | NM_007425.2    | 0.41        | 0.0001  | Signaling Transduction       |
| Tyrobp                                      | <i>TYRO Protein Tyrosine Kinase Binding Protein</i>        | NM_013485.1    | -1.39       | 0.03    | Signaling Transduction       |
| <u>Other</u>                                |                                                            |                |             |         |                              |
| Alox15                                      | <i>Arachidonate 15-lipoxygenase</i>                        | NM_001025093.1 | -3.27       | 0.0098  | Lipid Oxidation Enzyme       |
| Alox5                                       | <i>Arachidonate 5-lipoxygenase</i>                         | NM_009137.2    | -1.84       | 0.0411  | Lipid Oxidation Enzyme       |
| Arg1                                        | <i>Arginase1</i>                                           | NM_011413.2    | -0.6        | 0.0216  | Enzyme                       |
| Itgb2                                       | <i>Integrin Subunit Beta 2 (aka CD18)</i>                  | NM_011337.1    | -0.77       | 0.0444  | Integrin                     |
| Cfb                                         | <i>Complement Factor B</i>                                 | NM_011333.3    | 0.41        | 0.0346  | Complement Factor            |

\*From IPA analysis

## Table S4

Table S4 - Most significant canonical pathways altered by HSD in colonic lamina propria

| Canonical Pathways                                                             | Genes involved                                                           | p-value  | Ratio    | z-score |
|--------------------------------------------------------------------------------|--------------------------------------------------------------------------|----------|----------|---------|
| <b>Colon</b>                                                                   |                                                                          |          |          |         |
| Role of Macrophages, Fibroblasts and Endothelial Cells in Rheumatoid Arthritis | <i>MAP2K6,MYC,MAPK3,RAC1,HRAS,IL1B,CEBPB,CSF2,MAP2K1,IL1RAP,IL7,ATF2</i> | 1.07E-12 | 4.03E-02 | NaN     |
| Role of IL-17F in Allergic Inflammatory Airway Diseases                        | <i>CXCL10,CCL4,MAPK3,IL1B,CSF2,MAP2K1,ATF2</i>                           | 3.22E-12 | 1.71E-01 | 0       |
| IL-17 Signaling                                                                | <i>CXCL10,MAP2K6,MAPK3,HRAS,CEBPB,PTGS2,MAP2K1,ATF2</i>                  | 1.05E-11 | 9.52E-02 | NaN     |
| Communication between Innate and Adaptive Immune Cells                         | <i>CXCL10,CCL4,CCL3L3,IL1B,CSF2,HLA-DRB5,CCR7</i>                        | 6.07E-10 | 8.33E-02 | NaN     |
| Acute Phase Response Signaling                                                 | <i>MAP2K6,MAPK3,CFB,HRAS,IL1B,CEBPB,MAP2K1,IL1RAP</i>                    | 1.34E-09 | 5.23E-02 | 0.707   |
| Eicosanoid Signaling                                                           | <i>ALOX15,LTB4R,PTGER3,PTGS2,ALOX5,CYSLTR2</i>                           | 4.57E-09 | 9.68E-02 | NaN     |
| IL-6 Signaling                                                                 | <i>MAP2K6,MAPK3,HRAS,IL1B,CEBPB,MAP2K1,IL1RAP</i>                        | 8.45E-09 | 5.74E-02 | 0.378   |
| LPS-stimulated MAPK Signaling                                                  | <i>MAP2K6,MAPK3,RAC1,HRAS,MAP2K1,ATF2</i>                                | 3.36E-08 | 6.98E-02 | 1.633   |
| p38 MAPK Signaling                                                             | <i>MAP2K6,MYC,IL1B,MEF2C,IL1RAP,ATF2</i>                                 | 1.48E-07 | 5.45E-02 | 0       |

\*From IPA analysis



## Table S5

Table S5 - Most significant functions or diseases altered by HSD in colonic lamina propria

|                         | Function Or Disease                      | Genes involved                                                                                                                   | p-value  | Activation |
|-------------------------|------------------------------------------|----------------------------------------------------------------------------------------------------------------------------------|----------|------------|
| <b>Colon</b>            |                                          |                                                                                                                                  |          |            |
| Top 5 (Lowest P-values) | adhesion of immune cells                 | <i>ALOX15,CCL3L3,CCL4,CCR7,CSF2,CXCL10,CXCL3,CXCR4,HRAS,IL1B,IL7,ITGB2,LTB4R,MAP2K1,PTGS2,RAC1</i>                               | 3.18E-18 | -2.268     |
|                         | cellular homeostasis                     | <i>ARG1,CCL3L3,CCL4,CCR7,CSF2,CXCL10,CXCL3,CXCR4,HRAS,IL1B,IL7,IRF5,ITGB2,LTB4R,MAP2K1,MAPK3,MEF2C,MYC,PTGS2,RAC1,TYROBP</i>     | 8.01E-17 | -1.409     |
|                         | leukocyte migration                      | <i>ALOX15,ALOX5,CCL3L3,CCL4,CCR7,CSF2,CXCL10,CXCL3,CXCR4,HRAS,IL1B,IL7,IRF5,ITGB2,LTB4R,MYC,PTGS2,RAC1,TNFSF14,TYROBP</i>        | 9.04E-17 | -3.291     |
|                         | cell movement of leukocytes              | <i>ALOX5,CCL3L3,CCL4,CCR7,CSF2,CXCL10,CXCL3,CXCR4,HRAS,IL1B,IL7,ITGB2,LTB4R,MYC,PTGS2,RAC1,TNFSF14,TYROBP</i>                    | 1.64E-15 | -3.017     |
|                         | inflammatory response                    | <i>ALOX5,CCL3L3,CCL4,CCR7,CEBPB,CSF2,CXCL10,CXCL3,CXCR4,IL1B,ITGB2,LTB4R,PTGS2,RAC1,TNFSF14,TYROBP</i>                           | 4.47E-15 | -3.311     |
| Bottom 5 z-score        | Inflammatory Response                    | <i>ALOX5,CCL3L3,CCL4,CCR7,CEBPB,CSF2,CXCL10,CXCL3,CXCR4,IL1B,ITGB2,LTB4R,PTGS2,RAC1,TNFSF14,TYROBP</i>                           | 4.47E-15 | -3.3       |
|                         | Leukocyte Migration                      | <i>ALOX15,ALOX5,CCL3L3,CCL4,CCR7,CSF2,CXCL10,CXCL3,CXCR4,HRAS,IL1B,IL7,IRF5,ITGB2,LTB4R,MYC,PTGS2,RAC1,TNFSF14,TYROBP</i>        | 9.04E-17 | -3.29      |
|                         | Cell Movement of myeloid Cells           | <i>ALOX5,CCL3L3,CCL4,CCR7,CSF2,CXCL10,CXCL3,CXCR4,HRAS,IL1B,ITGB2,LTB4R,PTGS2,RAC1,TYROBP</i>                                    | 2.69E-14 | -3.26      |
|                         | Migration of Cells                       | <i>ALOX15,ALOX5,CCL3L3,CCL4,CCR7,CSF2,CXCL10,CXCL3,CXCR4,HRAS,IL1B,IL7,IRF5,ITGB2,LTB4R,MAP2K1,MYC,PTGS2,RAC1,TNFSF14,TYROBP</i> | 8.76E-15 | -3.2       |
|                         | Cell Movement of phagocytes              | <i>ALOX5,CCL3L3,CCL4,CCR7,CSF2,CXCL10,CXCL3,CXCR4,HRAS,IL1B,ITGB2,LTB4R,PTGS2,RAC1,TYROBP</i>                                    | 3.99E-14 | -3.01      |
| Top 5 z-score           | Cell Viability of lymphocytes            | <i>IL7,MAP2K1,MAPK3,MYC</i>                                                                                                      | 5.98E-04 | 1.925      |
|                         | Cell Viability of mononuclear leukocytes | <i>CSF2,IL7,MAP2K1,MAPK3,MYC</i>                                                                                                 | 5.01E-05 | 1.478      |
|                         | Maturation of Lymphocytes                | <i>CSF2,IL7,MAPK3,MYC,PTGS2,TYROBP</i>                                                                                           | 9.96E-08 | 1.109      |
|                         | Quantity of Lymphoid tissue              | <i>ARG1,CCR7,CXCR4,IL7,ITGB2,MAPK3,RAC1,TYROBP</i>                                                                               | 1.28E-06 | 1.06       |
|                         | Cell Cycle Progression                   | <i>CSF2,HRAS,IL1B,IL7,MAP2K1,MAP2K6,MYC,PTGS2</i>                                                                                | 9.25E-05 | 0.599      |

\*From IPA analysis

## Table S6

Table S6- List of the genes that are significantly altered by HSD in small intestine lamina propria

| Gene Code                                   | Gene Name                                          | Accession #    | log2(ratio) | P value | Type                         |
|---------------------------------------------|----------------------------------------------------|----------------|-------------|---------|------------------------------|
| <u>Cytokines, Chemokine and Receptors</u>   |                                                    |                |             |         |                              |
| Il12a                                       | <i>Interleukin 12A</i>                             | NM_008351.1    | -4.56       | 0.0141  | Cytokine                     |
| Il17a                                       | <i>Interleukin 17A</i>                             | NM_010552.3    | 2.1         | 0.0381  | Cytokine                     |
| Cxcr4                                       | <i>C-X-C motif Chemokine Receptor 4</i>            | NM_009911.3    | -1.3        | 0.0464  | Chemokine receptor           |
| Ltb4r2                                      | <i>Leukotriene B4 Receptor 2</i>                   | NM_020490.2    | 1.35        | 0.0139  | Leukotrienes Receptor        |
| <u>Transcription Factors and Regulators</u> |                                                    |                |             |         |                              |
| Mafk                                        | <i>V-Maf Avian Musculoaponeurotic Fibrosarcoma</i> | NM_010757.2    | -0.42       | 0.0133  | Transcription Factor         |
| Mef2b                                       | <i>Myocyte-specific Enhancer Factor 2B</i>         | NM_001045484.1 | -1.84       | 0.0201  | Transcription Factor         |
| Mef2c_Mm                                    | <i>Myocyte-specific Enhancer Factor 2C</i>         | NM_025282.2    | -0.88       | 0.0316  | Transcription Factor         |
| <u>Signal Transduction Elements</u>         |                                                    |                |             |         |                              |
| Map2k4                                      | <i>Mitogen-Activated Protein Kinase Kinase 4</i>   | NM_009157.4    | -0.15       | 0.0123  | Signal Transduction Kinsases |
| <u>Innate Immunity System</u>               |                                                    |                |             |         |                              |
| Tlr1                                        | <i>Toll-Like Receptor 1</i>                        | NM_030682.1    | -0.7        | 0.024   | Receptor                     |
| Tlr9                                        | <i>Toll-Like Receptor 9</i>                        | NM_031178.2    | -0.82       | 0.033   | Receptor                     |
| Defa-rs1                                    | <i>Alpha-Defensin-Related Sequence 1</i>           | NM_007844.2    | 0.5         | 0.0371  | Defensin                     |

\*From IPA analysis

## Table S7

Table S7 - Most significant canonical pathways altered by HSD in small intestine lamina propria

| Canonical Pathways                                                           | Genes involved                          | p-value  | Ratio    | z-score |
|------------------------------------------------------------------------------|-----------------------------------------|----------|----------|---------|
| <b>Small Intestine</b>                                                       |                                         |          |          |         |
| Role of Pattern Recognition Receptors in Recognition of Bacteria and Viruses | <i>MAP2K4, IL12A, TLR1, TLR9, IL17A</i> | 9.01E-09 | 3.79E-02 | NaN     |
| Toll-like Receptor Signaling                                                 | <i>MAP2K4, IL12A, TLR1, TLR9</i>        | 8.59E-08 | 5.56E-02 | NaN     |
| IL-17 Signaling                                                              | <i>MAP2K4, TLR9, IL17A</i>              | 1.76E-05 | 3.57E-02 | NaN     |
| Communication between Innate and Adaptive Immune Cells                       | <i>IL12A, TLR1, TLR9</i>                | 1.76E-05 | 3.57E-02 | NaN     |
| p38 MAPK Signaling                                                           | <i>MAP2K4, MEF2C, MEF2B</i>             | 3.95E-05 | 2.73E-02 | NaN     |

\*From IPA analysis

## Table S8

**Table S8 - List of genes that are statistically altered by DSS in Germ-Free mice**

Gene expression was acquired using Nanostring technology, from a customized gene panel

| Gene Name  | Gene Function | DSS*     | DSS*      | DSS*     | Control* | Control* | Control* | log2ratio | p-value |
|------------|---------------|----------|-----------|----------|----------|----------|----------|-----------|---------|
| GABAB      | Neuro         | 616.07   | 735.68    | 632.93   | 189.68   | 172.53   | 168.23   | 1.9       | 0.0001  |
| Tjp1       | Barrier       | 2192.85  | 2423.08   | 2210.85  | 1410.66  | 1233.45  | 1305.33  | 0.79      | 0.0005  |
| Cdh1       | Barrier       | 18558.07 | 17560.81  | 16639.28 | 11999.26 | 12128.77 | 10918.29 | 0.59      | 0.0009  |
| Mapk1      | Immune        | 4223.89  | 4414.01   | 4148.45  | 3550.86  | 3416.6   | 3458.43  | 0.29      | 0.0016  |
| Nfkb1      | Immune        | 1645.58  | 1844.32   | 1874.55  | 1240.21  | 1098.16  | 1217.55  | 0.59      | 0.0019  |
| NFAT       | Immune        | 1502.39  | 1691.27   | 1592.82  | 1127.83  | 1105.94  | 1061.49  | 0.54      | 0.0023  |
| Muc2       | Barrier       | 57291.14 | 61718.74  | 55687.45 | 15352.86 | 10675.6  | 12250.46 | 2.21      | 0.0027  |
| SEMAPHORIN | Neuro         | 198.83   | 234.09    | 189.73   | 86.14    | 83.96    | 112.14   | 1.15      | 0.0032  |
| Tollip     | Immune        | 1157.57  | 1243.7    | 1072.79  | 872.77   | 888.89   | 801.4    | 0.44      | 0.0059  |
| GDNF       | Neuro         | 63.05    | 119.63    | 97.31    | 31.85    | 16.8     | 21.11    | 2.01      | 0.0064  |
| Tff3       | Barrier       | 93229.47 | 109376.23 | 89628.82 | 61487.63 | 60132.8  | 47410.46 | 0.79      | 0.0076  |
| P75        | Neuro         | 156.04   | 154.35    | 198.64   | 96.24    | 80.07    | 107.27   | 0.84      | 0.0079  |
| NOS        | Neuro         | 266.32   | 375.56    | 266.57   | 163.16   | 154.04   | 108.89   | 1.09      | 0.0115  |
| Il23r      | Immune        | 52.35    | 43.74     | 23.81    | 6.59     | 2.2      | 8.11     | 2.95      | 0.019   |
| Tlr4       | Immune        | 867.07   | 964.61    | 940.27   | 446      | 537.53   | 621.77   | 0.8       | 0.0202  |
| F2r1l      | Immune        | 2594.45  | 2590.28   | 2353.39  | 2218.76  | 2074.39  | 1941.75  | 0.27      | 0.0204  |
| Tlr5       | Immune        | 73.74    | 83.61     | 101.76   | 52.05    | 59.63    | 40.62    | 0.77      | 0.0229  |
| Hif1a      | Immune        | 2278.43  | 2987.69   | 2397.93  | 4239     | 3347.49  | 3746.16  | -0.57     | 0.023   |
| CHAT       | Neuro         | 46.59    | 74.61     | 31.61    | 17.96    | 6.09     | 5.67     | 2.49      | 0.0236  |
| Rae1       | Barrier       | 823.45   | 926.03    | 874.57   | 757.87   | 753.6    | 671.35   | 0.27      | 0.0248  |
| Ocln       | Barrier       | 3872.49  | 3750.37   | 3223.08  | 2606.39  | 2924.1   | 2203.47  | 0.49      | 0.0321  |
| CALRET     | Neuro         | 18949.8  | 16364.71  | 20667.03 | 11789.66 | 14783    | 14612.45 | 0.44      | 0.0376  |
| CD11C      | Immune        | 140.4    | 118.34    | 125.15   | 67.2     | 44.05    | 76.38    | 1.07      | 0.0377  |
| Il22ra2    | Immune        | 265.49   | 249.52    | 315.57   | 434.63   | 350.65   | 519.36   | -0.64     | 0.0384  |
| SOX10      | Neuro         | 53.17    | 69.47     | 86.17    | 24.27    | 44.05    | 19.49    | 1.31      | 0.0441  |

\* Normalized transcript counts

# Table S9

**Table S9 - Effect of HSD in Germ Free mice colonic gene expression**

Gene expression was acquired using Nanostring technology, from a customized gene panel

| Gene Name  | Accession #    | %CV**  | Control Diet* | Control Diet* | Control Diet* | HSD*     | HSD*     | HSD*     | log2ratio | p-value |
|------------|----------------|--------|---------------|---------------|---------------|----------|----------|----------|-----------|---------|
| NFAT       | NM_010901.2    | 5.04   | 1204.52       | 1181.14       | 1133.67       | 1224.86  | 1299.2   | 1278.44  | 0.11      | 0.0366  |
| Hif1a      | NM_010431.2    | 22.36  | 4527.23       | 3575.11       | 4000.88       | 3097.03  | 2266.78  | 3356.97  | -0.49     | 0.0874  |
| Mapk1      | NM_011949.3    | 4.56   | 3792.3        | 3648.91       | 3693.58       | 3373.96  | 3418.93  | 3649.66  | -0.09     | 0.0998  |
| Tff3       | NM_011575.2    | 16     | 65668.45      | 64221.5       | 50634.1       | 49948.18 | 51113.29 | 43974.82 | -0.31     | 0.1062  |
| I-FABP     | NM_007980.2    | 30.2   | 1342.06       | 1255.99       | 1019.95       | 2324.59  | 1504.1   | 1427.85  | 0.51      | 0.1339  |
| Cldn2      | NM_016675.3    | 7.69   | 1854.49       | 1969.08       | 1868.05       | 1578.47  | 1713.06  | 1863.82  | -0.15     | 0.159   |
| CALRET     | NM_007591.3    | 11.63  | 12591.29      | 15788.17      | 15606.02      | 15721.58 | 17905.79 | 17265.02 | 0.22      | 0.1688  |
| Muc2       | NM_023566.2    | 19.3   | 16396.77      | 11401.49      | 13083.42      | 16955.2  | 14441.21 | 19648.53 | 0.33      | 0.1804  |
| Tollip     | NM_023764.3    | 10.42  | 932.12        | 949.33        | 855.89        | 868.96   | 838.99   | 698.17   | -0.19     | 0.1805  |
| Tlr5       | NM_016928.2    | 18.4   | 55.59         | 63.68         | 43.38         | 49.6     | 40.53    | 42.17    | -0.29     | 0.2171  |
| P75        | NM_033217.3    | 13.79  | 102.79        | 85.51         | 114.56        | 94.23    | 80.37    | 85.15    | -0.21     | 0.2214  |
| T-bet      | NM_019507.1    | 90.07  | 5.69          | 1.04          | 2.58          | 1.14     | 1        | 1.02     | -1.24     | 0.2229  |
| GFAP       | NM_001131020.1 | 28.26  | 82.56         | 61.6          | 45.98         | 45.03    | 54.35    | 40.12    | -0.42     | 0.226   |
| Cldn1      | NM_016674.3    | 13.83  | 114.92        | 105.26        | 114.56        | 78.21    | 95.82    | 111.76   | -0.24     | 0.2416  |
| SOX10      | NM_011437.1    | 29.76  | 25.92         | 47.05         | 20.81         | 45.03    | 38.9     | 44.21    | 0.54      | 0.2645  |
| Cdh1       | NM_009864.2    | 6.01   | 12815.14      | 12953.46      | 11660.67      | 11229.98 | 12488.97 | 11543.17 | -0.09     | 0.2665  |
| GATA-3     | NM_008091.3    | 25.39  | 32.66         | 15.86         | 32.09         | 37.02    | 35.65    | 37.05    | 0.52      | 0.2697  |
| GABAB      | NM_019439.3    | 9.52   | 202.58        | 184.26        | 179.67        | 224.69   | 182.82   | 215.12   | 0.13      | 0.2893  |
| Cnlp       | NM_009921.2    | 67.37  | 9.74          | 1.31          | 3.45          | 11.84    | 3.94     | 12.49    | 1.24      | 0.2908  |
| 5HT        | NM_010484.2    | 18.19  | 271.35        | 250.79        | 236.09        | 207.52   | 263.32   | 158.83   | -0.3      | 0.293   |
| VIP        | NM_011702.2    | 24.32  | 729.84        | 897.36        | 507.79        | 584.02   | 567.41   | 504.75   | -0.33     | 0.3007  |
| NPY        | NM_023456.2    | 99.59  | 1.35          | 5.47          | 1             | 1        | 1        | 1.02     | -0.95     | 0.3356  |
| CD11C      | NM_021334.2    | 32.58  | 71.77         | 47.05         | 81.57         | 82.79    | 121.03   | 60.59    | 0.38      | 0.3703  |
| NOS        | NM_008712.2    | 17.69  | 174.26        | 164.51        | 116.3         | 205.24   | 163.31   | 154.74   | 0.21      | 0.3971  |
| TGR5       | NM_174985.1    | 106.61 | 5.69          | 1.04          | 1             | 1        | 1        | 1.02     | -0.84     | 0.415   |
| Myd88      | NM_010851.2    | 16.97  | 437.22        | 504.43        | 610.22        | 477.59   | 682.06   | 604.02   | 0.18      | 0.4244  |
| CALB       | NM_009788.4    | 104.92 | 5.69          | 1.04          | 1             | 1.14     | 1        | 1        | -0.79     | 0.4404  |
| NR2B       | NM_008171.3    | 5.43   | 1             | 1.04          | 1             | 1.14     | 1        | 1.02     | 0.06      | 0.4445  |
| CCR6       | NM_001190333.1 | 69.96  | 70.42         | 25.22         | 131.92        | 56.47    | 220.22   | 89.24    | 0.75      | 0.4559  |
| HMGB1      | NM_010439.3    | 7.16   | 1478.26       | 1496.11       | 1251.72       | 1325.56  | 1367.5   | 1303     | -0.08     | 0.4572  |
| Gpr44      | NM_009962.2    | 58.53  | 3             | 1.04          | 1             | 1.14     | 1        | 1.02     | -0.47     | 0.4606  |
| CD11b      | NM_001082960.1 | 35.93  | 25.92         | 32.5          | 69.42         | 40.45    | 60.86    | 52.4     | 0.38      | 0.4792  |
| Rae1       | NM_175112.5    | 6.4    | 809.4         | 804.84        | 717           | 707.61   | 725.97   | 800.51   | -0.06     | 0.4798  |
| F2r1l      | NM_007974.4    | 7.77   | 2369.62       | 2215.44       | 2073.78       | 2242.19  | 2206.61  | 1880.2   | -0.08     | 0.4898  |
| Nfkb1      | NM_008689.2    | 8.8    | 1324.53       | 1172.83       | 1300.33       | 1182.52  | 1365.87  | 1475.95  | 0.08      | 0.5125  |
| Casp8      | NM_009812.2    | 13.47  | 580.16        | 612.54        | 700.5         | 476.45   | 590.18   | 688.96   | -0.12     | 0.5382  |
| Il23r      | NM_144548.1    | 43.88  | 7.04          | 2.35          | 8.66          | 8.41     | 10.45    | 4.3      | 0.47      | 0.547   |
| Tlr4       | NM_021297.2    | 26.33  | 476.32        | 574.07        | 664.04        | 452.42   | 899.15   | 697.14   | 0.21      | 0.5536  |
| SUBP       | XM_006505028.1 | 27.15  | 487.11        | 451.41        | 276.02        | 376.89   | 426.75   | 230.47   | -0.24     | 0.5603  |
| BDNF       | NM_007540.4    | 88.97  | 1.65          | 1.04          | 1             | 4.97     | 1        | 1.02     | 0.52      | 0.571   |
| Reg3g      | NM_011260.1    | 54.64  | 40.76         | 8.59          | 41.64         | 22.14    | 63.3     | 29.89    | 0.51      | 0.6009  |
| CGRP       | NM_007587.2    | 12.48  | 1.35          | 1.04          | 1             | 1.14     | 1        | 1.02     | -0.09     | 0.6038  |
| Defcr1     | NM_010031.2    | 12.48  | 1.35          | 1.04          | 1             | 1.14     | 1        | 1.02     | -0.09     | 0.6038  |
| GABAA      | NM_010252.4    | 12.48  | 1.35          | 1.04          | 1             | 1.14     | 1        | 1.02     | -0.09     | 0.6038  |
| Il17a      | NM_010552.3    | 12.48  | 1.35          | 1.04          | 1             | 1.14     | 1        | 1.02     | -0.09     | 0.6038  |
| PGP9.5     | NM_011670.2    | 12.48  | 1.35          | 1.04          | 1             | 1.14     | 1        | 1.02     | -0.09     | 0.6038  |
| TAAR1      | NM_053205.1    | 12.48  | 1.35          | 1.04          | 1             | 1.14     | 1        | 1.02     | -0.09     | 0.6038  |
| SEMAPHORIN | NM_011352.2    | 17.37  | 92            | 89.67         | 119.77        | 96.52    | 134.85   | 96.41    | 0.11      | 0.6128  |
| S100BETA   | NM_009115.3    | 49.2   | 11.09         | 8.59          | 9.53          | 17.56    | 11.26    | 2.25     | -0.34     | 0.7414  |
| NR2D       | NM_008172.2    | 18.51  | 42.1          | 36.65         | 26.89         | 41.59    | 29.15    | 41.14    | 0.09      | 0.7462  |
| Il22ra2    | NM_178258.5    | 40.16  | 464.19        | 374.49        | 554.67        | 312.81   | 899.97   | 484.28   | 0.17      | 0.7512  |
| CCR2       | NM_009915.2    | 30.86  | 175.61        | 206.09        | 306.4         | 152.6    | 308.04   | 181.35   | -0.13     | 0.7612  |
| CXCR3      | NM_009910.2    | 26.02  | 42.1          | 52.25         | 42.51         | 40.45    | 63.3     | 28.86    | -0.11     | 0.7684  |
| MMP9       | NM_013599.2    | 33     | 92            | 72            | 36.44         | 73.64    | 51.91    | 47.28    | -0.14     | 0.7757  |
| Pparg      | NM_011146.1    | 25.97  | 25.92         | 16.9          | 18.21         | 24.43    | 12.07    | 21.7     | -0.11     | 0.7901  |
| CHAT       | NM_009891.2    | 73.29  | 19.18         | 6.51          | 6.05          | 23.28    | 1        | 14.53    | -0.39     | 0.8176  |
| trpv1      | NM_001001445.1 | 40.53  | 11.09         | 7.55          | 6.05          | 11.84    | 3.13     | 10.44    | -0.13     | 0.8585  |
| Cxcr4      | NM_009911.3    | 41.77  | 449.35        | 222.72        | 328.97        | 233.85   | 604.82   | 283.69   | 0.1       | 0.8623  |
| Mylk3      | NM_175441.5    | 123.04 | 12.44         | 1.04          | 1             | 1.14     | 6.38     | 1.02     | -0.26     | 0.8677  |
| TAAR4      | NM_001008499.1 | 69.65  | 7.04          | 2.35          | 5.18          | 3.83     | 1.5      | 11.46    | -0.13     | 0.9037  |
| Lyz1       | NM_013590.3    | 45.08  | 7008.48       | 7605.24       | 11796.09      | 5960.21  | 17006.51 | 7054.53  | 0.06      | 0.9136  |
| Tlr2       | NM_011905.2    | 35.18  | 100.09        | 84.47         | 162.3         | 81.65    | 178.76   | 102.55   | 0.04      | 0.9289  |
| Tjp1       | NM_009386.1    | 4.42   | 1506.58       | 1317.32       | 1394.09       | 1414.82  | 1381.32  | 1429.9   | 0         | 0.9409  |
| C3         | NM_009778.2    | 41.53  | 5196.09       | 2381.76       | 3592.89       | 3200.02  | 6301.34  | 2355.06  | 0.03      | 0.9555  |
| Nod2       | NM_145857.2    | 66.67  | 7.04          | 6.51          | 26.89         | 6.12     | 10.45    | 17.61    | -0.04     | 0.9591  |
| GDNF       | NM_010275.2    | 38.74  | 34.01         | 17.94         | 22.55         | 41.59    | 17.76    | 19.65    | 0.03      | 0.9593  |
| Ocln       | NM_008756.2    | 17.75  | 2783.61       | 3122.92       | 2353.3        | 2423     | 3586.42  | 2406.23  | 0.01      | 0.9652  |
| Cd86       | NM_019388.3    | 38.99  | 62.33         | 33.54         | 63.35         | 35.87    | 89.32    | 43.19    | 0.02      | 0.9685  |

\* Normalized transcripts counts

\*\* Coefficient of variation percentage

**Table S10****Table S10 - Fecal microbiota genera comparison between recipient mice groups**

| <b>TAXONOMY: GENERA</b>                 | <b>Test-Statistic</b> | <b>p-Value</b> | <b>q (FDR)</b> |
|-----------------------------------------|-----------------------|----------------|----------------|
| Moryella                                | -3.738                | 0.013          | 0.229          |
| Parabacteroides                         | 2.577                 | 0.050          | 0.419          |
| Enterobacter                            | -2.255                | 0.074          | 0.419          |
| Akkermansia                             | -1.768                | 0.137          | 0.525          |
| Mucispirillum                           | 1.630                 | 0.164          | 0.525          |
| Turicibacter                            | 1.535                 | 0.185          | 0.525          |
| Lachnospira                             | -1.387                | 0.224          | 0.544          |
| Oscillospira                            | -1.198                | 0.285          | 0.545          |
| Ruminococcus                            | -1.187                | 0.289          | 0.545          |
| Lachnospiraceae (Unclassified Genus)    | -1.098                | 0.322          | 0.548          |
| Lactobacillus                           | 0.794                 | 0.463          | 0.655          |
| Eubacterium                             | -0.772                | 0.475          | 0.655          |
| Clostridiales (Unclassified Genus)      | 0.725                 | 0.501          | 0.655          |
| Blautia                                 | -0.173                | 0.869          | 1.000          |
| Porphyromonadaceae (Unclassified Genus) | 0.094                 | 0.929          | 1.000          |
| Enterococcaceae (Unclassified Genus)    | -0.064                | 0.952          | 1.000          |
